# Supplementary material
Source: Springer Nature journal article supplement (https://www.springermedizin.de/resource/supplementary/13023_2009_324_MOESM3_ESM.pdf/9642112)

# Regulation of the activation of the alternative pathway

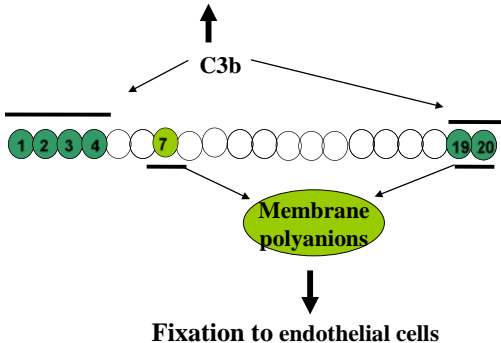

Supplement: MOESM3 [file 9642112]
